# Supplementary material for: Integrated associations of genotypes with multiple blood biomarkers linked to coronary heart disease risk
Source: PubMed Central journal article supplement — Hum Mol Genet. 2009 Mar 31;18(12):2305–16. doi: 10.1093/hmg/ddp159 (PMC2685759; doi:10.1093/hmg/ddp159), 2009-03-31

**Supplementary Table 1.** Baseline characteristics and intermediate phenotypes in

those men who went on to develop CHD and those men who remained disease free

|                                       | <b>Number of<br/>measures</b> | <b>No CHD<br/>N=2751</b> | <b>With CHD<br/>N=301</b> | P- Value | OR per<br>tertile |
|---------------------------------------|-------------------------------|--------------------------|---------------------------|----------|-------------------|
| Age (years)                           |                               | 56.0 (3.5)               | 56.5 (3.6)                | 0.020    |                   |
| Smoking (% Current)                   | 6                             | 27.6%                    | 37.5%                     | <0.001   | 1.57              |
| BMI (kg/m <sup>2</sup> ) <sup>†</sup> | 6                             | 26.4 (3.55)              | 26.9 (3.38)               | 0.006    | 1.22              |
| SBP (mmHg)                            | 6                             | 137.6 (19.0)             | 142.6 (19.7)              | <0.001   | 1.27              |
| DBP (mmHg)                            | 6                             | 84.2 (11.2)              | 87.0 (11.4)               | <0.001   | 1.30              |
| Cholesterol (mmol/l)                  | 6                             | 5.70 (1.01)              | 6.05 (1.02)               | <0.001   | 1.43              |
| HDL (mmol/l)                          | 1                             | 1.72 (0.59)              | 1.60 (0.54)               | 0.002    | 0.77              |
| LDL (mmol/l)                          | 1                             | 3.06 (1.01)              | 3.36 (0.96)               | <0.001   | 1.39              |
| Triglyceride (mmol/l)                 | 6                             | 2.05 (1.26)              | 2.35 (1.34)               | <0.001   | 1.39              |
| ApoB (g/l)                            | 1                             | 0.89 (0.26)              | 0.95 (0.23)               | <0.001   | 1.53              |
| ApoA1 (g/l)                           | 1                             | 1.64 (0.32)              | 1.61 (0.29)               | 0.151    | 0.89              |
| Homocysteine µmol/l                   | 1                             | 12.75 (5.06)             | 13.50 (5.65)              | 0.977    | 1.13              |
| Folate µmol/l                         | 1                             | 233.6 (64.6)             | 242.0 (70.1)              | 0.155    | 1.18              |
| Lp-PLA2 nmol/min/ml                   | 1                             | 49.4 (16.0)              | 50.6 (16.6)               | 0.200    | 1.15              |
| CRP mg/l                              | 1                             | 5.57 (7.06)              | 7.79 (11.52)              | <0.001   | 1.35              |
| FVIIc g/l                             |                               | 109.2 (28.9)             | 108.2 (29.7)              | 0.572    | 0.99              |
| (FVII<br>antigen/FVIIc/FVIIa)         | 6                             |                          |                           |          |                   |
| Fibrinogen g/l                        | 6                             | 275.4 (55.7)             | 286.0 (49.8)              | <0.001   | 1.37              |

**Supplementary Table 2** Genic scan: genes showing association with blood phenotypes

| Phenotype     | Previous GWAS hit ( alternate phenotype previously showing association) | rs                    | gene                  | p-value  | FDR adj pvalue | Common vs Rare HMZ* | % R2 | MAF  |
|---------------|-------------------------------------------------------------------------|-----------------------|-----------------------|----------|----------------|---------------------|------|------|
| Triglycerides |                                                                         | rs301                 | <i>LPL</i>            | 1.59E-06 | 0.01           | -0.314              | 1.12 | 24.0 |
|               | (1) (LDL)                                                               | rs6589566             | <i>APOA5-A4-C3-A1</i> | 1.98E-05 | 0.01           | 0.633               | 0.91 | 7.0  |
|               |                                                                         | E40K(2)               | <i>ANGPTL4</i>        | 2.23E-05 | 0.01           | -0.420              | 0.69 | 2.1  |
|               |                                                                         | rs264                 | <i>LPL</i>            | 2.46E-05 | 0.01           | -0.217              | 0.89 | 15.1 |
|               |                                                                         | rs662799              | <i>APOA5</i>          | 3.15E-05 | 0.01           | 0.817               | 0.81 | 6.1  |
|               |                                                                         | rs13702               | <i>LPL</i>            | 6.20E-05 | 0.01           | -0.247              | 0.81 | 28.4 |
|               |                                                                         | rs3135506             | <i>APOA5</i>          | 1.50E-04 | 0.02           | 1.076               | 0.71 | 5.7  |
|               |                                                                         | rs3779788             | <i>LPL</i>            | 2.26E-04 | 0.03           | -0.184              | 0.70 | 15.3 |
|               |                                                                         | rs5072                | <i>APOA5-A4-C3-A1</i> | 2.78E-04 | 0.03           | 0.527               | 0.69 | 7.3  |
|               |                                                                         | rs579163              | <i>APOA5-A4-C3-A1</i> | 2.81E-04 | 0.03           | 0.258               | 0.69 | 32.6 |
|               | (3)                                                                     | rs328                 | <i>LPL</i>            | 3.68E-04 | 0.03           | -0.189              | 0.66 | 10.9 |
|               |                                                                         | rs5128                | <i>APOA5-A4-C3-A1</i> | 6.05E-04 | 0.04           | 0.444               | 0.58 | 8.0  |
|               |                                                                         | rs1131012             | <i>PECAMI</i>         | 7.41E-04 | 0.05           | -0.040              | 0.53 | 48.6 |
|               |                                                                         | rs4075015             | <i>IL6R</i>           | 1.04E-03 | 0.06           | 0.220               | 0.58 | 41.5 |
|               |                                                                         | rs12285095            | <i>APOA5-A4-C3-A1</i> | 1.09E-03 | 0.06           | 0.880               | 0.57 | 5.9  |
|               |                                                                         | rs4803455             | <i>TGFB1</i>          | 1.25E-03 | 0.06           | -0.022              | 0.56 | 49.9 |
|               |                                                                         | rs7252574 (2)         | <i>ANGPTL4</i>        | 1.26E-03 | 0.06           | -0.008              | 0.50 | 49.5 |
|               |                                                                         | rs780094              | <i>GCKR</i>           | 1.61E-03 | 0.07           | 0.213               | 0.48 | 37.8 |
|               |                                                                         | rs268                 | <i>LPL</i>            | 1.81E-03 | 0.08           | -0.964              | 0.53 | 2.1  |
|               |                                                                         | rs4520                | <i>APOA5-A4-C3-A1</i> | 3.07E-03 | 0.11           | 0.298               | 0.45 | 21.3 |
|               |                                                                         | rs4508523             | <i>LDLR</i>           | 3.15E-03 | 0.11           | 0.298               | 0.48 | 12.5 |
|               |                                                                         | rs5142                | <i>APOA5-A4-C3-A1</i> | 3.66E-03 | 0.12           | 0.211               | 0.47 | 8.0  |
|               |                                                                         | rs3781600             | <i>LRP5</i>           | 4.07E-03 | 0.13           | 0.858               | 0.46 | 8.4  |
|               |                                                                         | rs3289                | <i>LPL</i>            | 4.79E-03 | 0.14           | 1.267               | 0.45 | 2.7  |
|               |                                                                         | rs3211719             | <i>F7</i>             | 5.26E-03 | 0.15           | 0.269               | 0.44 | 24.6 |
|               |                                                                         | rs316                 | <i>LPL</i>            | 5.42E-03 | 0.15           | -0.463              | 0.44 | 11.9 |
|               |                                                                         | rs7255436 (2)         | <i>ANGPTL4</i>        | 5.77E-03 | 0.16           | -0.019              | 0.38 | 49.0 |
|               |                                                                         | rs7746553             | <i>C2</i>             | 6.21E-03 | 0.16           | 0.282               | 0.43 | 16.4 |
|               |                                                                         | rs689                 | <i>INS</i>            | 6.39E-03 | 0.16           | 0.235               | 0.43 | 27.6 |
|               |                                                                         | rs2479408             | <i>PCSK9</i>          | 6.74E-03 | 0.16           | 0.215               | 0.42 | 19.9 |
|               |                                                                         | rs11216157            | <i>APOA5-A4-C3-A1</i> | 7.08E-03 | 0.17           | 0.542               | 0.42 | 11.8 |
|               |                                                                         | rs499718              | <i>PCSK9</i>          | 7.53E-03 | 0.17           | 0.315               | 0.41 | 18.1 |
|               |                                                                         | rs5128                | <i>APOA5-A4-C3-A1</i> | 7.77E-03 | 0.17           | 0.173               | 0.38 | 36.5 |
|               | rs4417316                                                               | <i>APOA5-A4-C3-A1</i> | 8.93E-03              | 0.19     | -0.085         | 0.40                | 10.0 |      |
|               | rs397211                                                                | <i>ILRN1</i>          | 9.08E-03              | 0.19     | 0.178          | 0.39                | 30.5 |      |
|               | rs676210                                                                | <i>APOB</i>           | 1.02E-02              | 0.20     | -0.213         | 0.38                | 21.5 |      |
|               | rs11465699                                                              | <i>IL18RAP</i>        | 1.02E-02              | 0.20     | -0.447         | 0.38                | 4.4  |      |
| Cholesterol   |                                                                         | rs429358/<br>rs7412   | <i>APOE-C1-C2-C4</i>  | 1.09E-19 | 0.01           | 0.124               | 3.28 | 33.7 |
|               | (3)                                                                     | rs6511720             | <i>LDLR</i>           | 1.11E-07 | 0.01           | -0.462              | 1.34 | 12.3 |
|               | (3,4,5), (6) (AD), (7) (AD)                                             | rs4420638             | <i>APOE-C1-C2-C4</i>  | 2.50E-06 | 0.01           | 0.405               | 1.08 | 19.1 |
|               |                                                                         | rs6413504             | <i>LDLR</i>           | 5.54E-06 | 0.01           | 0.293               | 1.01 | 49.0 |
|               |                                                                         | rs2738446             | <i>LDLR</i>           | 1.62E-05 | 0.01           | 0.273               | 0.92 | 45.3 |
|               |                                                                         | rs2228671             | <i>LDLR</i>           | 3.11E-05 | 0.01           | -0.419              | 0.87 | 13.1 |
|               |                                                                         | rs585967              | <i>APOB</i>           | 1.60E-04 | 0.02           | -0.391              | 0.73 | 14.8 |
|               |                                                                         | rs12713843            | <i>APOB</i>           | 1.69E-04 | 0.02           | 0.799               | 0.59 | 49.5 |
|               |                                                                         | rs952275              | <i>APOB</i>           | 4.02E-04 | 0.04           | -0.222              | 0.66 | 49.2 |
|               |                                                                         | rs12714264            | <i>APOB</i>           | 5.07E-04 | 0.04           | -0.322              | 0.64 | 13.5 |
|               |                                                                         | rs11591147            | <i>PCSK9</i>          | 1.04E-03 | 0.08           | -2.741              | 0.56 | 0.9  |

|                 |                                  |                     |                       |          |      |        |      |      |
|-----------------|----------------------------------|---------------------|-----------------------|----------|------|--------|------|------|
|                 |                                  | rs10199768          | <i>APOB</i>           | 1.43E-03 | 0.10 | 0.213  | 0.55 | 44.0 |
|                 |                                  | rs7259004           | <i>APOE-C1-C2-C4</i>  | 2.61E-03 | 0.16 | -0.269 | 0.50 | 10.8 |
|                 |                                  | rs11602256          | <i>LRP5</i>           | 3.35E-03 | 0.18 | 0.165  | 0.48 | 32.6 |
|                 |                                  | rs1367117           | <i>APOB</i>           | 3.47E-03 | 0.18 | 0.216  | 0.47 | 32.8 |
|                 |                                  | rs934197            | <i>APOB</i>           | 3.60E-03 | 0.18 | 0.216  | 0.47 | 32.7 |
| LDL-cholesterol |                                  | rs429358/<br>rs7412 | <i>APOE-C1-C2-C4</i>  | 3.49E-17 | 0.01 | 0.116  | 3.34 | 33.2 |
|                 | (3), (4)                         | rs6511720           | <i>LDLR</i>           | 5.57E-07 | 0.01 | -0.612 | 1.39 | 12.2 |
|                 |                                  | rs585967            | <i>APOB</i>           | 1.51E-06 | 0.01 | -0.564 | 1.29 | 14.6 |
|                 |                                  | rs2228671           | <i>LDLR</i>           | 6.36E-06 | 0.01 | -0.588 | 1.15 | 13.0 |
|                 |                                  | rs12714264          | <i>APOB</i>           | 6.79E-06 | 0.01 | -0.499 | 1.15 | 13.4 |
|                 | (3)-4), (6)<br>(AD), (7)<br>(AD) | rs4420638           | <i>APOE-C1-C2-C4</i>  | 3.75E-05 | 0.01 | 0.469  | 0.98 | 18.8 |
|                 |                                  | rs952275            | <i>APOB</i>           | 5.37E-05 | 0.01 | -0.271 | 0.95 | 49.2 |
|                 |                                  | rs12691202          | <i>APOB</i>           | 4.42E-04 | 0.04 | -0.730 | 0.74 | 3.8  |
|                 |                                  | rs11591147          | <i>PCSK9</i>          | 4.49E-04 | 0.04 | -2.389 | 0.73 | 0.9  |
|                 |                                  | rs729287            | <i>ALX4</i>           | 9.20E-04 | 0.08 | -0.297 | 0.68 | 29.6 |
|                 |                                  | rs3740878           | <i>EXT2</i>           | 1.11E-03 | 0.08 | -0.291 | 0.66 | 29.9 |
|                 |                                  | rs8110695           | <i>LDLR</i>           | 1.75E-03 | 0.12 | -0.187 | 0.61 | 21.6 |
|                 |                                  | rs6413504           | <i>LDLR</i>           | 2.10E-03 | 0.13 | 0.213  | 0.60 | 49.1 |
|                 |                                  | rs10199768          | <i>APOB</i>           | 2.81E-03 | 0.15 | 0.215  | 0.57 | 44.3 |
|                 |                                  | rs7259004           | <i>APOE-C1-C2-C4</i>  | 3.05E-03 | 0.15 | -0.394 | 0.56 | 10.9 |
|                 |                                  | rs1051931           | <i>PLA2G7</i>         | 3.09E-03 | 0.15 | 0.298  | 0.56 | 19.1 |
|                 |                                  | rs423490            | <i>C3</i>             | 3.38E-03 | 0.15 | -0.186 | 0.55 | 24.0 |
|                 |                                  | rs1051931           | <i>PLA2G7</i>         | 3.41E-03 | 0.15 | 0.239  | 0.49 | 19.0 |
|                 |                                  | rs344548            | <i>C3</i>             | 3.45E-03 | 0.15 | -0.298 | 0.55 | 16.8 |
|                 |                                  | rs10811661          | <i>CDKN2A/2B</i>      | 4.34E-03 | 0.17 | -0.385 | 0.47 | 15.8 |
|                 |                                  | rs8112351           | <i>C3</i>             | 4.80E-03 | 0.18 | -0.188 | 0.52 | 23.9 |
|                 |                                  | rs3814309           | <i>GSTM3</i>          | 5.52E-03 | 0.20 | -0.063 | 0.50 | 32.0 |
|                 |                                  | rs1367117           | <i>APOB</i>           | 5.81E-03 | 0.20 | 0.190  | 0.50 | 33.0 |
| HDL-cholesterol |                                  | rs708272            | <i>CETP</i>           | 8.88E-05 | 0.07 | 0.272  | 0.85 | 44.0 |
|                 |                                  | rs1729410           | <i>APOA5-A4-C3-A1</i> | 4.11E-04 | 0.13 | 0.221  | 0.76 | 43.2 |
|                 |                                  | rs1800588           | <i>LIPC</i>           | 6.95E-04 | 0.13 | 0.313  | 0.71 | 20.9 |
|                 |                                  | rs264               | <i>LPL</i>            | 8.25E-04 | 0.13 | 0.214  | 0.69 | 15.1 |
|                 |                                  | rs328               | <i>LPL</i>            | 1.05E-03 | 0.14 | 0.459  | 0.60 | 10.3 |
|                 |                                  | rs4769060           | <i>ALOX5AP</i>        | 1.92E-03 | 0.19 | 0.217  | 0.61 | 45.1 |
| ApoAI           | (3) (HDL)                        | rs1800588           | <i>LIPC</i>           | 4.94E-05 | 0.03 | 0.329  | 0.96 | 20.9 |
|                 |                                  | rs708272            | <i>CETP</i>           | 6.90E-05 | 0.03 | 0.273  | 0.87 | 43.9 |
|                 |                                  | rs3885907           | <i>ALOX5AP</i>        | 6.06E-04 | 0.15 | 0.240  | 0.71 | 45.7 |
|                 |                                  | rs1729410           | <i>APOA5-A4-C3-A1</i> | 7.45E-04 | 0.15 | 0.214  | 0.69 | 43.2 |
|                 |                                  | alul(8)             | <i>IGF2</i>           | 9.53E-04 | 0.15 | 0.231  | 0.74 | 47.3 |
|                 |                                  | rs344550            | <i>C3</i>             | 1.46E-03 | 0.20 | 0.033  | 0.63 | 34.8 |
|                 |                                  | rs5167              | <i>APOE-C1-C2-C4</i>  | 1.76E-03 | 0.20 | 0.206  | 0.62 | 34.4 |
|                 |                                  | rs10162089          | <i>ALOX5AP</i>        | 1.96E-03 | 0.20 | 0.220  | 0.60 | 47.9 |
|                 | (3)(HDL,<br>TG)                  | rs328               | <i>LPL</i>            | 2.22E-03 | 0.20 | 0.574  | 0.53 | 10.3 |
| APOB            |                                  | rs429358/<br>rs7412 | <i>APOE-C1-C2-C4</i>  | 1.27E-16 | 0.01 | 0.068  | 3.16 | 33.2 |
|                 | (3) (LDL)                        | rs11591147          | <i>PCSK9</i>          | 4.41E-05 | 0.02 | -3.130 | 0.95 | 0.9  |
|                 |                                  | rs7259004           | <i>APOE-C1-C2-C4</i>  | 1.95E-04 | 0.06 | -0.093 | 0.82 | 10.9 |
|                 |                                  | rs585967            | <i>APOB</i>           | 8.31E-04 | 0.14 | -0.333 | 0.68 | 14.6 |
|                 |                                  | rs952275            | <i>APOB</i>           | 9.07E-04 | 0.14 | -0.202 | 0.68 | 49.2 |
|                 |                                  | rs1537236           | <i>GSTM4</i>          | 1.07E-03 | 0.14 | 0.060  | 0.66 | 48.8 |
|                 | (3) (LDL);<br>(5)(LDL)           | rs6511720           | <i>LDLR</i>           | 1.25E-03 | 0.14 | -0.199 | 0.64 | 12.2 |
|                 |                                  | rs1121923           | <i>LPL</i>            | 1.71E-03 | 0.15 | -1.984 | 0.61 | 3.0  |
|                 |                                  | rs729287            | <i>ALX4</i>           | 1.75E-03 | 0.15 | -0.295 | 0.61 | 29.6 |
|                 |                                  | rs3740878           | <i>EXT2</i>           | 1.87E-03 | 0.15 | -0.289 | 0.61 | 29.9 |
|                 |                                  | rs2738446           | <i>LDLR</i>           | 2.28E-03 | 0.16 | 0.145  | 0.59 | 45.6 |
|                 |                                  | rs2228671           | <i>LDLR</i>           | 2.43E-03 | 0.16 | -0.387 | 0.58 | 13.0 |

|            |                                                             |                     |                       |               |      |        |       |      |
|------------|-------------------------------------------------------------|---------------------|-----------------------|---------------|------|--------|-------|------|
| Lp-PLA2    |                                                             | rs429358/<br>rs7412 | <i>APOE-C1-C2-C4</i>  | 2.55E-14      | 0.01 | 0.210  | 3.00  | 35.0 |
|            | (4)(LDL);<br>(9)(LDL);<br>(5)(LDL) (6)<br>(AD) (7)<br>(AD)  | rs4420638           | <i>APOE-C1-C2-C4</i>  | 1.41E-06      | 0.01 | 0.490  | 1.48  | 19.5 |
|            |                                                             | rs3918232           | <i>NOS3</i>           | 4.32E-04      | 0.12 | -1.031 | 0.68  | 49.7 |
| BMI        |                                                             | 6815A>T (8)         | <i>IGF2</i>           | 1.59E-05      | 0.02 | -0.439 | 0.93  | 23.5 |
|            |                                                             | rs680               | <i>IGF2</i>           | 4.81E-04      | 0.19 | -0.302 | 0.60  | 26.9 |
| Fibrinogen |                                                             | rs4508864           | <i>FGA-B-G</i>        | 1.31E-07      | 0.01 | 0.425  | 1.32  | 18.9 |
|            |                                                             | rs1800790           | <i>FGB</i>            | 2.74E-07      | 0.01 | 0.368  | 1.18  | 19.3 |
|            |                                                             | rs4220              | <i>FGA-B-G</i>        | 9.66E-07      | 0.01 | 0.347  | 1.16  | 17.1 |
|            |                                                             | rs2070016           | <i>FGA-B-G</i>        | 6.50E-06      | 0.01 | 0.377  | 1.00  | 14.8 |
|            |                                                             | rs1685354           | <i>UCP3</i>           | 8.50E-04      | 0.14 | 0.311  | 0.59  | 25.2 |
|            |                                                             | rs1537236           | <i>GSTM4</i>          | 1.61E-03      | 0.20 | 0.199  | 0.54  | 48.9 |
|            |                                                             | rs618923            | <i>ApoA5-A4-C3-A1</i> | 1.75E-03      | 0.20 | -0.064 | 0.53  | 23.9 |
| FVII       |                                                             | rs6046              | <i>F7</i>             | 9.20E-<br>140 | 0.01 | -2.154 | 23.59 | 10.3 |
|            |                                                             | insdel(10)          | <i>F7</i>             | 1.89E-<br>126 | 0.01 | -2.065 | 19.84 | 10.6 |
|            |                                                             | rs555212            | <i>F7</i>             | 1.76E-34      | 0.01 | 0.814  | 6.33  | 23.8 |
|            |                                                             | -670A>C (10)        | <i>F7</i>             | 1.39E-31      | 0.01 | 0.806  | 6.06  | 23.2 |
|            |                                                             | -402G>C (10)        | <i>F7</i>             | 3.57E-22      | 0.01 | 0.580  | 3.96  | 25.1 |
|            |                                                             | rs867186            | <i>PROCR</i>          | 5.81E-13      | 0.01 | 0.825  | 2.25  | 9.1  |
|            |                                                             | rs11576175          | <i>CTSS</i>           | 2.39E-04      | 0.03 | 0.609  | 0.70  | 8.3  |
|            |                                                             | rs780094            | <i>GCKR</i>           | 2.69E-04      | 0.03 | 0.234  | 0.61  | 37.8 |
|            |                                                             | rs4676411           | <i>CAPN10</i>         | 1.84E-03      | 0.14 | 0.129  | 0.53  | 37.9 |
|            |                                                             | rs11602906          | <i>UCP2</i>           | 1.95E-03      | 0.14 | 0.200  | 0.52  | 7.5  |
|            |                                                             | rs5167              | <i>APOE-C1-C2-C4</i>  | 2.26E-03      | 0.15 | 0.048  | 0.52  | 34.3 |
|            |                                                             | rs6413504           | <i>LDLR</i>           | 2.63E-03      | 0.16 | 0.193  | 0.50  | 48.9 |
|            |                                                             | rs3211719           | <i>F7</i>             | 2.90E-03      | 0.17 | 0.281  | 0.51  | 24.6 |
|            |                                                             | rs11536857          | <i>TLR4</i>           | 3.12E-03      | 0.17 | 0.698  | 0.48  | 7.8  |
| CRP        |                                                             | rs429358/<br>rs7412 | <i>APOE-C1-C2-C4</i>  | 1.28E-10      | 0.01 | -0.320 | 1.90  | 33.9 |
|            | (4)(LDL);<br>(3)(LDL);<br>(5)(LDL);<br>(6) (AD),<br>(7)(AD) | rs4420638           | <i>APOE-C1-C2-C4</i>  | 2.41E-07      | 0.01 | -0.401 | 1.39  | 19.4 |
|            |                                                             | rs3093077           | <i>CRP</i>            | 1.03E-04      | 0.03 | -0.245 | 0.75  | 33.7 |
|            |                                                             | rs1130864           | <i>CRP</i>            | 2.19E-04      | 0.05 | 0.229  | 0.98  | 32.0 |
|            |                                                             | rs3091244           | <i>CRP</i>            | 2.70E-04      | 0.05 | 0.188  | 0.67  | 5.4  |

\*Standardised difference

\*\* Standardised difference common HMZ vs HTZ

**Supplementary Table 3** Categories and candidate genes and the number of SNPs analysed in each, included in the 768 Illumina bundle

| <i>Inflammation genes</i> | <i>Lipid genes</i> | <i>ROS genes</i>     | <i>Clotting genes</i> | <i>T2D</i>   | <i>Complement genes</i> | <i>Genes of Interest</i> | <i>CNV tSNPs</i> |                  |          |            |           |                |          |    |
|---------------------------|--------------------|----------------------|-----------------------|--------------|-------------------------|--------------------------|------------------|------------------|----------|------------|-----------|----------------|----------|----|
| <i>IFNG</i>               | 10                 | <i>APOA2</i>         | 11                    | <i>CAT</i>   | 13                      | <i>F2</i>                | 12               | <i>CALPAIN10</i> | 14       | <i>BF</i>  | 13        | <i>GSK3</i>    | 4        | 59 |
| <i>IL10</i>               | 7                  | <i>APOB</i>          | 39                    | <i>GSTM1</i> | 5                       | <i>F7</i>                | 7                |                  |          | <i>C2</i>  | 8         | <i>G6PD</i>    | 2        |    |
| <i>IL18RAP</i>            | 17                 | <i>APOE-C1-C2-C4</i> | 13                    | <i>GSTM3</i> | 7                       | <i>FIBA-FIBB-FIBG</i>    | <u>16</u>        | <i>ALX4</i>      | 1        | <i>C3</i>  | 33        | <i>ZNF202</i>  | 11       |    |
| <i>IL1A</i>               | 3                  | <i>LPL</i>           | 27                    | <i>GSTM5</i> | 9                       |                          | 35               | <i>CAMTA1</i>    | 1        | <i>CFD</i> | 7         | <i>ALOX5AP</i> | 26       |    |
| <i>IL1B</i>               | 6                  | <i>LIPE</i>          | 6                     | <i>HMOX1</i> | 7                       |                          |                  | <i>CXCR4???</i>  | 1        | <i>CFH</i> | <u>18</u> | <i>NDST1</i>   | 9        |    |
| <i>IL6</i>                | 10                 | <i>LRP1</i>          | 21                    | <i>HSPD1</i> | 3                       |                          |                  | <i>CYBA</i>      | 1        |            | 79        | <i>MMP3</i>    | 6        |    |
| <i>IL6R</i>               | 14                 | <i>SREBP1</i>        | 4                     | <i>NOS3</i>  | 14                      |                          |                  | <i>EXT2</i>      | 1        |            |           | <i>CTSS</i>    | 3        |    |
| <i>IL6ST</i>              | 10                 | <i>A5-A4-C3-A1</i>   | 35                    | <i>SELS</i>  | 9                       |                          |                  | <i>HHEX</i>      | 2        |            |           | <i>TIMP1</i>   | <u>4</u> |    |
| <i>ILRN1</i>              | 12                 | <i>LDLR</i>          | 22                    | <i>SOD2</i>  | 14                      |                          |                  | <i>KCNJ11</i>    | 1        |            |           |                | 65       |    |
| <i>LTA</i>                | 11                 | <i>LRP5</i>          | 27                    | <i>UCP2</i>  | 8                       |                          |                  | <i>KCTD12</i>    | 1        |            |           |                |          |    |
| <i>MYD88</i>              | 4                  | <i>PCSK9</i>         | <u>21</u>             | <i>UCP3</i>  | 6                       |                          |                  | <i>MMP26</i>     | 1        |            |           |                |          |    |
| <i>PLA2G7</i>             | 13                 |                      | 226                   | <i>PRDX5</i> | 3                       |                          |                  | <i>NEUROG3</i>   | 1        |            |           |                |          |    |
| <i>PLA2GX</i>             | 1                  |                      |                       | <i>GSTM4</i> | <u>1</u>                |                          |                  | <i>PSMA6</i>     | 1        |            |           |                |          |    |
| <i>TGFB1</i>              | 8                  |                      |                       |              | 99                      |                          |                  | <i>SLC30A8</i>   | 1        |            |           |                |          |    |
| <i>TGFB3</i>              | 9                  |                      |                       |              |                         |                          |                  | <i>rs1804451</i> | 1        |            |           |                |          |    |
| <i>TLR2</i>               | 13                 |                      |                       |              |                         |                          |                  | <i>rs1256517</i> | <u>1</u> |            |           |                |          |    |
| <i>TLR4</i>               | 20                 |                      |                       |              |                         |                          |                  |                  | 29       |            |           |                |          |    |
| <i>TNF</i>                | <u>2</u>           |                      |                       |              |                         |                          |                  |                  |          |            |           |                |          |    |
|                           | 170                |                      |                       |              |                         |                          |                  |                  |          |            |           |                |          |    |

**Supplementary Table 4** Additional candidate genes analysed in NPHSII

| <i>Gene</i>           | <i>No of SNPs</i> | <i>Gene</i>    | <i>No of SNPs</i> | <i>Gene</i>     | <i>No of SNPs</i> | <i>Gene</i>   | <i>No of SNPs</i> | <i>Gene</i> |
|-----------------------|-------------------|----------------|-------------------|-----------------|-------------------|---------------|-------------------|-------------|
| <i>ACE</i>            | 1                 | <i>F2</i>      | 1                 | <i>LTBP4</i>    | 1                 | <i>TPO</i>    | 2                 |             |
| <i>ADH1C</i>          | 1                 | <i>F5</i>      | 1                 | <i>LTBP4</i>    | 7                 | <i>UCP2</i>   | 1                 |             |
| <i>ADIPOQ</i>         | 4                 | <i>F7</i>      | 4                 | <i>MMP3</i>     | 1                 | <i>UCP3</i>   | 1                 |             |
| <i>ADRB1</i>          | 1                 | <i>FGA-B-G</i> | 4                 | <i>MTHFR</i>    | 1                 | <i>VEGF</i>   | 1                 |             |
| <i>ADRB3</i>          | 1                 | <i>FTO</i>     | 1                 | <i>MTP</i>      | 3                 | <i>WNT5</i>   | 1                 |             |
| <i>AGT</i>            | 8                 | <i>GAL</i>     | 1                 | <i>MTR</i>      | 1                 | <i>ZNF202</i> | 1                 |             |
| <i>ANGPTL3</i>        | 2                 | <i>GCH1</i>    | 1                 | <i>NOS3</i>     | 4                 |               |                   |             |
| <i>ANGPTL4</i>        | 7                 | <i>GCKR</i>    | 1                 | <i>PCSK9</i>    | 3                 |               |                   |             |
| <i>APOA1-C3-A4-A5</i> | 11                | <i>GSTM1</i>   | 1                 | <i>PECAM1</i>   | 3                 |               |                   |             |
| <i>APOB</i>           | 7                 | <i>GSTT1</i>   | 1                 | <i>PLA2G5</i>   | 2                 |               |                   |             |
| <i>APOE</i>           | 1                 | <i>HABP2</i>   | 1                 | <i>PLA2G7</i>   | 1                 |               |                   |             |
| <i>ARH</i>            | 1                 | <i>IGF12</i>   | 1                 | <i>PLG</i>      | 1                 |               |                   |             |
| <i>AT1</i>            | 1                 | <i>IGF2</i>    | 10                | <i>PON1</i>     | 2                 |               |                   |             |
| <i>AT2</i>            | 2                 | <i>IL18</i>    | 8                 | <i>PON2</i>     | 1                 |               |                   |             |
| <i>BK1</i>            | 2                 | <i>IL6</i>     | 3                 | <i>PON3</i>     | 1                 |               |                   |             |
| <i>BK2</i>            | 2                 | <i>INS</i>     | 1                 | <i>PPARA</i>    | 3                 |               |                   |             |
| <i>CBS</i>            | 2                 | <i>INSIG1</i>  | 1                 | <i>PPARD</i>    | 1                 |               |                   |             |
| <i>CDKN2A</i>         | 2                 | <i>LCAT</i>    | 1                 | <i>PPARG</i>    | 3                 |               |                   |             |
| <i>CETP</i>           | 1                 | <i>LDLR</i>    | 2                 | <i>PROCR</i>    | 1                 |               |                   |             |
| <i>CNR1</i>           | 1                 | <i>LIPC</i>    | 1                 | <i>SERPINA1</i> | 3                 |               |                   |             |
| <i>CRP</i>            | 4                 | <i>LIPE</i>    | 2                 | <i>SERPINE1</i> | 1                 |               |                   |             |
| <i>CTGF</i>           | 1                 | <i>LPL</i>     | 5                 | <i>TCF7L2</i>   | 2                 |               |                   |             |
| <i>CYP11P2</i>        | 1                 | <i>LTBP1</i>   | 1                 | <i>THBD</i>     | 2                 |               |                   |             |
| <i>F12</i>            | 1                 | <i>LTBP3</i>   | 3                 | <i>TNFA</i>     | 1                 |               |                   |             |

**Supplementary Table 5a** List of Genes and SNPs with rs numbers included in the 768 Illumina bead Array

| <i>rs</i>  | <i>Gene</i> | <i>rs</i>  | <i>gene</i> | <i>rs</i>  | <i>gene</i> |
|------------|-------------|------------|-------------|------------|-------------|
| rs1256517  | LOC646279   | rs3766404  | CFH         | rs17547610 | LRP1        |
| rs1800764  | ACE         | rs380390   | CFH         | rs1800127  | LRP1        |
| rs4459609  | ACE         | rs402032   | CFH         | rs1800159  | LRP1        |
| rs2055049  | AGTR1       | rs419137   | CFH         | rs1800168  | LRP1        |
| rs2276736  | AGTR1       | rs460184   | CFH         | rs2229278  | LRP1        |
| rs388915   | AGTR1       | rs515299   | CFH         | rs4759044  | LRP1        |
| rs5182     | AGTR1       | rs534399   | CFH         | rs715948   | LRP1        |
| rs5186     | AGTR1       | rs7524776  | CFH         | rs7304504  | LRP1        |
| rs931490   | AGTR1       | rs1136774  | CTSS        | rs7306742  | LRP1        |
| rs10162089 | ALOX5AP     | rs11576175 | CTSS        | rs7398375  | LRP1        |
| rs10507391 | ALOX5AP     | rs7511673  | CTSS        | rs7485650  | LRP1        |
| rs11147439 | ALOX5AP     | rs932206   | CXCR4       | rs7956957  | LRP1        |
| rs12019512 | ALOX5AP     | rs2254073  | CYBA        | rs7968719  | LRP1        |
| rs12429692 | ALOX5AP     | rs3740878  | EXT2        | rs922963   | LRP1        |
| rs17222814 | ALOX5AP     | rs1799963  | F2          | rs11574422 | LRP5        |
| rs17238738 | ALOX5AP     | rs2070852  | F2          | rs11602256 | LRP5        |
| rs17245120 | ALOX5AP     | rs3136430  | F2          | rs11826287 | LRP5        |
| rs17245317 | ALOX5AP     | rs3136431  | F2          | rs12417792 | LRP5        |
| rs3885907  | ALOX5AP     | rs3136440  | F2          | rs2242340  | LRP5        |
| rs3935644  | ALOX5AP     | rs3136456  | F2          | rs2508836  | LRP5        |
| rs4073261  | ALOX5AP     | rs3136457  | F2          | rs312009   | LRP5        |
| rs4075131  | ALOX5AP     | rs3136520  | F2          | rs312014   | LRP5        |
| rs4076128  | ALOX5AP     | rs3136532  | F2          | rs312016   | LRP5        |
| rs4254165  | ALOX5AP     | rs4752930  | F2          | rs312786   | LRP5        |
| rs4503649  | ALOX5AP     | rs5896     | F2          | rs312788   | LRP5        |
| rs4597169  | ALOX5AP     | rs5898     | F2          | rs314756   | LRP5        |
| rs4769055  | ALOX5AP     | rs1475931  | F7          | rs3736228  | LRP5        |
| rs4769060  | ALOX5AP     | rs3093248  | F7          | rs3781596  | LRP5        |
| rs4769873  | ALOX5AP     | rs3211719  | F7          | rs3781600  | LRP5        |
| rs4769875  | ALOX5AP     | rs510317   | F7          | rs491347   | LRP5        |
| rs9315051  | ALOX5AP     | rs555212   | F7          | rs4930573  | LRP5        |
| rs9508835  | ALOX5AP     | rs574229   | F7          | rs4988300  | LRP5        |
| rs9578196  | ALOX5AP     | rs6046     | F7          | rs4988327  | LRP5        |
| rs9579648  | ALOX5AP     | rs1118823  | FGA-B-G     | rs4988331  | LRP5        |
| rs9671124  | ALOX5AP     | rs1800788  | FGA-B-G     | rs587397   | LRP5        |
| rs729287   | ALX4        | rs1800792  | FGA-B-G     | rs606989   | LRP5        |
| rs11590967 | APOA2       | rs2066860  | FGA-B-G     | rs608343   | LRP5        |
| rs12721035 | APOA2       | rs2066870  | FGA-B-G     | rs624947   | LRP5        |
| rs1803091  | APOA2       | rs2070016  | FGA-B-G     | rs638051   | LRP5        |

|            |                |            |         |            |       |
|------------|----------------|------------|---------|------------|-------|
| rs2070902  | APOA2          | rs2070018  | FGA-B-G | rs676318   | LRP5  |
| rs3557     | APOA2          | rs2070022  | FGA-B-G | rs7116604  | LRP5  |
| rs5082     | APOA2          | rs2070025  | FGA-B-G | rs1041981  | LTA   |
| rs5085     | APOA2          | rs4220     | FGA-B-G | rs1799964  | LTA   |
| rs3813627  | APOA2          | rs4463047  | FGA-B-G | rs1800629  | LTA   |
| rs4233368  | APOA2          | rs4508864  | FGA-B-G | rs1800683  | LTA   |
| rs4489574  | APOA2          | rs6054     | FGA-B-G | rs2009658  | LTA   |
| rs7528588  | APOA2          | rs7659024  | FGA-B-G | rs2071590  | LTA   |
| rs11216157 | ApoA5-A4-C3-A1 | rs7659613  | FGA-B-G | rs2229094  | LTA   |
| rs11216159 | ApoA5-A4-C3-A1 | rs7673587  | FGA-B-G | rs2844484  | LTA   |
| rs12284864 | ApoA5-A4-C3-A1 | rs1050828  | G6PD    | rs3093662  | LTA   |
| rs12285095 | ApoA5-A4-C3-A1 | rs2230037  | G6PD    | rs3093668  | LTA   |
| rs12365440 | ApoA5-A4-C3-A1 | rs2302485  | GSK3    | rs915654   | LTA   |
| rs12365462 | ApoA5-A4-C3-A1 | rs3745233  | GSK3    | rs2499953  | MMP26 |
| rs1263173  | ApoA5-A4-C3-A1 | rs3810149  | GSK3    | rs3025090  | MMP3  |
| rs12718464 | ApoA5-A4-C3-A1 | rs708598   | GSK3    | rs476762   | MMP3  |
| rs1729410  | ApoA5-A4-C3-A1 | rs12068997 | GSTM1   | rs522616   | MMP3  |
| rs2071521  | ApoA5-A4-C3-A1 | rs12097277 | GSTM1   | rs527832   | MMP3  |
| rs2071523  | ApoA5-A4-C3-A1 | rs12562055 | GSTM1   | rs650108   | MMP3  |
| rs2075291  | ApoA5-A4-C3-A1 | rs4147565  | GSTM1   | rs679620   | MMP3  |
| rs2075294  | ApoA5-A4-C3-A1 | rs4147567  | GSTM1   | rs6796045  | MYD88 |
| rs2098453  | ApoA5-A4-C3-A1 | rs1055259  | GSTM3   | rs6853     | MYD88 |
| rs2216311  | ApoA5-A4-C3-A1 | rs1332018  | GSTM3   | rs7625290  | MYD88 |
| rs2727789  | ApoA5-A4-C3-A1 | rs1537234  | GSTM3   | rs7744     | MYD88 |
| rs2849174  | ApoA5-A4-C3-A1 | rs1803687  | GSTM3   | rs10074650 | NDST1 |
| rs33989105 | ApoA5-A4-C3-A1 | rs2234696  | GSTM3   | rs11959543 | NDST1 |
| rs35625356 | ApoA5-A4-C3-A1 | rs3814309  | GSTM3   | rs12516924 | NDST1 |
| rs35631472 | ApoA5-A4-C3-A1 | rs4970737  | GSTM3   | rs2273232  | NDST1 |
| rs35833621 | ApoA5-A4-C3-A1 | rs1537236  | GSTM4   | rs2273233  | NDST1 |
| rs4417316  | ApoA5-A4-C3-A1 | rs10776699 | GSTM5   | rs2545342  | NDST1 |
| rs5072     | ApoA5-A4-C3-A1 | rs11101992 | GSTM5   | rs2748216  | NDST1 |



|            |                |            |         |            |       |
|------------|----------------|------------|---------|------------|-------|
| rs5101     | ApoA5-A4-C3-A1 | rs11807    | GSTM5   | rs3095902  | NDST1 |
| rs5142     | ApoA5-A4-C3-A1 | rs12743015 | GSTM5   | rs3797621  | NDST1 |
| rs579163   | ApoA5-A4-C3-A1 | rs366631   | GSTM5   | rs10823406 | NGN3  |
| rs595049   | ApoA5-A4-C3-A1 | rs3768490  | GSTM5   | rs10277237 | NOS3  |
| rs601634   | ApoA5-A4-C3-A1 | rs4970772  | GSTM5   | rs1799983  | NOS3  |
| rs603446   | ApoA5-A4-C3-A1 | rs886177   | GSTM5   | rs1800779  | NOS3  |
| rs618354   | ApoA5-A4-C3-A1 | rs929166   | GSTM5   | rs1800783  | NOS3  |
| rs618923   | ApoA5-A4-C3-A1 | rs1111875  | HHEX    | rs2070744  | NOS3  |
| rs6589566  | ApoA5-A4-C3-A1 | rs7923837  | HHEX    | rs2373929  | NOS3  |
| rs6589567  | ApoA5-A4-C3-A1 | rs11912889 | HMOX1   | rs3918166  | NOS3  |
| rs6589568  | ApoA5-A4-C3-A1 | rs2071746  | HMOX1   | rs3918186  | NOS3  |
| rs9804646  | ApoA5-A4-C3-A1 | rs2285112  | HMOX1   | rs3918188  | NOS3  |
| rs10199768 | APOB           | rs5755713  | HMOX1   | rs3918201  | NOS3  |
| rs1042031  | APOB           | rs5755720  | HMOX1   | rs3918227  | NOS3  |
| rs11126598 | APOB           | rs743811   | HMOX1   | rs3918232  | NOS3  |
| rs11676704 | APOB           | rs9282702  | HMOX1   | rs3918234  | NOS3  |
| rs12691202 | APOB           | rs2340690  | HSPD1   | rs743507   | NOS3  |
| rs12713450 | APOB           | rs6434930  | HSPD1   | rs10465832 | PCSK9 |
| rs12713540 | APOB           | rs788016   | HSPD1   | rs10888896 | PCSK9 |
| rs12713554 | APOB           | rs10878763 | IFNG    | rs11206514 | PCSK9 |
| rs12713559 | APOB           | rs11177074 | IFNG    | rs11583680 | PCSK9 |
| rs12713675 | APOB           | rs2069709  | IFNG    | rs13312    | PCSK9 |
| rs12713843 | APOB           | rs2069713  | IFNG    | rs17111495 | PCSK9 |
| rs12714097 | APOB           | rs2069716  | IFNG    | rs2182833  | PCSK9 |
| rs12714214 | APOB           | rs2069718  | IFNG    | rs2479406  | PCSK9 |
| rs12714225 | APOB           | rs2069720  | IFNG    | rs2479408  | PCSK9 |
| rs12714264 | APOB           | rs2069727  | IFNG    | rs2479409  | PCSK9 |
| rs12720791 | APOB           | rs2069728  | IFNG    | rs2495481  | PCSK9 |
| rs12720801 | APOB           | rs3181033  | IFNG    | rs4927193  | PCSK9 |
| rs12720843 | APOB           | rs1800871  | IL10    | rs499718   | PCSK9 |
| rs12720848 | APOB           | rs1800890  | IL10    | rs505151   | PCSK9 |
| rs12720854 | APOB           | rs1878672  | IL10    | rs529787   | PCSK9 |
| rs13306187 | APOB           | rs3021094  | IL10    | rs533375   | PCSK9 |
| rs1367117  | APOB           | rs3024505  | IL10    | rs557435   | PCSK9 |
| rs1713223  | APOB           | rs3024509  | IL10    | rs562556   | PCSK9 |
| rs17398765 | APOB           | rs6673928  | IL10    | rs568052   | PCSK9 |
| rs1801700  | APOB           | rs11465699 | IL18RAP | rs572512   | PCSK9 |
| rs1801701  | APOB           | rs11465716 | IL18RAP | rs7552841  | PCSK9 |

|            |               |            |         |            |         |
|------------|---------------|------------|---------|------------|---------|
| rs1801702  | APOB          | rs11465724 | IL18RAP | rs9804032  | PCSK9   |
| rs1801703  | APOB          | rs11465730 | IL18RAP | rs1051931  | PLA2G7  |
| rs2163204  | APOB          | rs11465732 | IL18RAP | rs10948300 | PLA2G7  |
| rs2854725  | APOB          | rs11695455 | IL18RAP | rs12195701 | PLA2G7  |
| rs520354   | APOB          | rs11886793 | IL18RAP | rs12528807 | PLA2G7  |
| rs533617   | APOB          | rs17027173 | IL18RAP | rs1421368  | PLA2G7  |
| rs550619   | APOB          | rs17821875 | IL18RAP | rs1421378  | PLA2G7  |
| rs584542   | APOB          | rs2075186  | IL18RAP | rs16874962 | PLA2G7  |
| rs585967   | APOB          | rs2293225  | IL18RAP | rs17288905 | PLA2G7  |
| rs6752026  | APOB          | rs3771150  | IL18RAP | rs1805018  | PLA2G7  |
| rs676210   | APOB          | rs6543139  | IL18RAP | rs2216465  | PLA2G7  |
| rs679899   | APOB          | rs6741230  | IL18RAP | rs4498351  | PLA2G7  |
| rs934197   | APOB          | rs7559479  | IL18RAP | rs6929105  | PLA2G7  |
| rs952275   | APOB          | rs7559845  | IL18RAP | rs974670   | PLA2G7  |
| rs10413089 | APOE-C1-C2-C4 | rs917998   | IL18RAP | rs584367   | PLA2GX  |
| rs12691089 | APOE-C1-C2-C4 | rs17561    | IL1A    | rs11600990 | PRDX5   |
| rs405509   | APOE-C1-C2-C4 | rs2071373  | IL1A    | rs4930702  | PRDX5   |
| rs429358   | APOE-C1-C2-C4 | rs2856838  | IL1A    | rs9787810  | PRDX5   |
| rs439401   | APOE-C1-C2-C4 | rs1143630  | IL1B    | rs1048990  | PSMA6   |
| rs4420638  | APOE-C1-C2-C4 | rs1143634  | IL1B    | rs12438654 | SELS    |
| rs4803770  | APOE-C1-C2-C4 | rs1143643  | IL1B    | rs2101171  | SELS    |
| rs5112     | APOE-C1-C2-C4 | rs16944    | IL1B    | rs2291250  | SELS    |
| rs5126     | APOE-C1-C2-C4 | rs2853550  | IL1B    | rs2306534  | SELS    |
| rs5127     | APOE-C1-C2-C4 | rs4848306  | IL1B    | rs4965372  | SELS    |
| rs5167     | APOE-C1-C2-C4 | rs10242595 | IL6     | rs4965815  | SELS    |
| rs7259004  | APOE-C1-C2-C4 | rs10499563 | IL6     | rs7178239  | SELS    |
| rs7259679  | APOE-C1-C2-C4 | rs11766273 | IL6     | rs8036413  | SELS    |
| rs1048709  | BF            | rs12700386 | IL6     | rs9874     | SELS    |
| rs1270942  | BF            | rs13306435 | IL6     | rs13266634 | SLC30A8 |
| rs2072633  | BF            | rs1800795  | IL6     | rs1804451  | SOD2    |
| rs4151651  | BF            | rs1800796  | IL6     | rs2758329  | SOD2    |
| rs4151657  | BF            | rs2069830  | IL6     | rs2758331  | SOD2    |
| rs4151659  | BF            | rs2069840  | IL6     | rs2842980  | SOD2    |
| rs4151660  | BF            | rs2069861  | IL6     | rs2855115  | SOD2    |
| rs4151664  | BF            | rs11584622 | IL6R    | rs4342445  | SOD2    |
| rs4151667  | BF            | rs1386821  | IL6R    | rs4987023  | SOD2    |
| rs537160   | BF            | rs1552481  | IL6R    | rs5746101  | SOD2    |
| rs641153   | BF            | rs28730736 | IL6R    | rs5746128  | SOD2    |
| rs9332730  | BF            | rs4075015  | IL6R    | rs5746129  | SOD2    |
| rs9501161  | BF            | rs4240872  | IL6R    | rs5746133  | SOD2    |
| rs2734335  | C2            | rs4329505  | IL6R    | rs5746136  | SOD2    |
| rs3020644  | C2            | rs4601580  | IL6R    | rs5746151  | SOD2    |
| rs4151648  | C2            | rs4845615  | IL6R    | rs7855     | SOD2    |
| rs497309   | C2            | rs4845617  | IL6R    | rs9456442  | SOD2    |
| rs547154   | C2            | rs4845618  | IL6R    | rs11656665 | SREBP1  |
| rs7746553  | C2            | rs6684439  | IL6R    | rs2228461  | SREBP1  |

|            |        |            |        |            |        |
|------------|--------|------------|--------|------------|--------|
| rs9267677  | C2     | rs7526293  | IL6R   | rs2229590  | SREBP1 |
| rs9332739  | C2     | rs8192284  | IL6R   | rs4925118  | SREBP1 |
| rs1047286  | C3     | rs10076283 | IL6ST  | rs10417924 | TGFB1  |
| rs11569422 | C3     | rs10180    | IL6ST  | rs12980942 | TGFB1  |
| rs11569429 | C3     | rs1063560  | IL6ST  | rs1800469  | TGFB1  |
| rs11569450 | C3     | rs10940495 | IL6ST  | rs1800471  | TGFB1  |
| rs11569523 | C3     | rs11574780 | IL6ST  | rs1800472  | TGFB1  |
| rs11569534 | C3     | rs1900173  | IL6ST  | rs4803455  | TGFB1  |
| rs11569538 | C3     | rs2228043  | IL6ST  | rs8110090  | TGFB1  |
| rs11569541 | C3     | rs2228046  | IL6ST  | rs8179181  | TGFB1  |
| rs11672613 | C3     | rs3729960  | IL6ST  | rs11466414 | TGFB3  |
| rs1389623  | C3     | rs6870870  | IL6ST  | rs2268625  | TGFB3  |
| rs163913   | C3     | rs17486819 | ILRN1  | rs2268626  | TGFB3  |
| rs2230199  | C3     | rs2637988  | ILRN1  | rs3917148  | TGFB3  |
| rs2230203  | C3     | rs3087263  | ILRN1  | rs3917158  | TGFB3  |
| rs2230204  | C3     | rs315920   | ILRN1  | rs3917200  | TGFB3  |
| rs2230205  | C3     | rs315936   | ILRN1  | rs3917210  | TGFB3  |
| rs2230210  | C3     | rs315946   | ILRN1  | rs4252315  | TGFB3  |
| rs2241393  | C3     | rs315952   | ILRN1  | rs7156293  | TGFB3  |
| rs2241394  | C3     | rs380092   | ILRN1  | rs13440825 | TIMP1  |
| rs2250656  | C3     | rs397211   | ILRN1  | rs2070584  | TIMP1  |
| rs2277984  | C3     | rs4251961  | ILRN1  | rs2077407  | TIMP1  |
| rs237554   | C3     | rs4252019  | ILRN1  | rs6520278  | TIMP1  |
| rs2642196  | C3     | rs4252041  | ILRN1  | rs11938228 | TLR2   |
| rs344540   | C3     | rs5219     | KCNJ11 | rs1339     | TLR2   |
| rs344548   | C3     | rs2876711  | KCTD12 | rs1898830  | TLR2   |
| rs344550   | C3     | rs10409044 | LDLR   | rs3804099  | TLR2   |
| rs344555   | C3     | rs11669576 | LDLR   | rs3804100  | TLR2   |
| rs3745568  | C3     | rs12608650 | LDLR   | rs4696480  | TLR2   |
| rs379527   | C3     | rs13306505 | LDLR   | rs4696483  | TLR2   |
| rs423490   | C3     | rs13306510 | LDLR   | rs5743699  | TLR2   |
| rs432001   | C3     | rs1799898  | LDLR   | rs5743703  | TLR2   |
| rs432823   | C3     | rs2228671  | LDLR   | rs5743704  | TLR2   |
| rs7257062  | C3     | rs2569540  | LDLR   | rs5743708  | TLR2   |
| rs8112351  | C3     | rs2738446  | LDLR   | rs720633   | TLR2   |
| rs1193179  | CAMTA1 | rs2738459  | LDLR   | rs7656411  | TLR2   |
| rs10933621 | CAPN10 | rs2738460  | LDLR   | rs893629   | TLR2   |
| rs1133353  | CAPN10 | rs2738464  | LDLR   | rs10759930 | TLR4   |
| rs11680323 | CAPN10 | rs4508523  | LDLR   | rs10818073 | TLR4   |
| rs2953147  | CAPN10 | rs5927     | LDLR   | rs11536857 | TLR4   |
| rs2953149  | CAPN10 | rs5928     | LDLR   | rs11536869 | TLR4   |
| rs2953161  | CAPN10 | rs5930     | LDLR   | rs11536889 | TLR4   |
| rs2975766  | CAPN10 | rs5931     | LDLR   | rs11536897 | TLR4   |
| rs3749164  | CAPN10 | rs6413504  | LDLR   | rs1554973  | TLR4   |
| rs3792267  | CAPN10 | rs6511720  | LDLR   | rs16906079 | TLR4   |
| rs3792270  | CAPN10 | rs7508676  | LDLR   | rs1927906  | TLR4   |

|            |        |            |      |            |        |
|------------|--------|------------|------|------------|--------|
| rs3792272  | CAPN10 | rs8108932  | LDLR | rs1927907  | TLR4   |
| rs3828345  | CAPN10 | rs8110695  | LDLR | rs2149356  | TLR4   |
| rs4234123  | CAPN10 | rs10099160 | LPL  | rs2770144  | TLR4   |
| rs4676411  | CAPN10 | rs1121923  | LPL  | rs2770150  | TLR4   |
| rs10488736 | CAT    | rs13702    | LPL  | rs4987233  | TLR4   |
| rs11032699 | CAT    | rs1534649  | LPL  | rs5030717  | TLR4   |
| rs11032702 | CAT    | rs17410577 | LPL  | rs5030718  | TLR4   |
| rs11032703 | CAT    | rs1800590  | LPL  | rs5030719  | TLR4   |
| rs16925614 | CAT    | rs1801177  | LPL  | rs5031050  | TLR4   |
| rs208682   | CAT    | rs2197089  | LPL  | rs7044464  | TLR4   |
| rs2266630  | CAT    | rs248      | LPL  | rs7869402  | TLR4   |
| rs2284368  | CAT    | rs249      | LPL  | rs2507961  | TNF    |
| rs511895   | CAT    | rs253      | LPL  | rs4645843  | TNF    |
| rs554518   | CAT    | rs264      | LPL  | rs1050892  | UCP2   |
| rs564250   | CAT    | rs268      | LPL  | rs11602906 | UCP2   |
| rs566979   | CAT    | rs270      | LPL  | rs2306820  | UCP2   |
| rs7933285  | CAT    | rs281      | LPL  | rs2632725  | UCP2   |
| rs7947841  | CAT    | rs283      | LPL  | rs643064   | UCP2   |
| rs12985692 | CFD    | rs285      | LPL  | rs655717   | UCP2   |
| rs13090    | CFD    | rs298      | LPL  | rs659366   | UCP2   |
| rs1651895  | CFD    | rs301      | LPL  | rs660339   | UCP2   |
| rs1683564  | CFD    | rs316      | LPL  | rs1685354  | UCP3   |
| rs17684161 | CFD    | rs328      | LPL  | rs1800849  | UCP3   |
| rs2230216  | CFD    | rs3289     | LPL  | rs2229707  | UCP3   |
| rs3826945  | CFD    | rs3779788  | LPL  | rs2734827  | UCP3   |
| rs1061170  | CFH    | rs4921684  | LPL  | rs3781907  | UCP3   |
| rs1065489  | CFH    | rs5934     | LPL  | rs7926165  | UCP3   |
| rs10801560 | CFH    | rs7016529  | LPL  | rs1077911  | ZNF202 |
| rs10922096 | CFH    | rs9644636  | LPL  | rs10893079 | ZNF202 |
| rs1329421  | CFH    | rs10783814 | LRP1 | rs11219263 | ZNF202 |
| rs1329423  | CFH    | rs10876966 | LRP1 | rs11219270 | ZNF202 |
| rs17434860 | CFH    | rs11172113 | LRP1 | rs12794996 | ZNF202 |
| rs2019727  | CFH    | rs12369345 | LRP1 | rs1557429  | ZNF202 |
| rs3753394  | CFH    | rs12578897 | LRP1 | rs2282641  | ZNF202 |
| rs3753395  | CFH    | rs12814239 | LRP1 | rs2282646  | ZNF202 |
|            |        | rs1466535  | LRP1 | rs3183878  | ZNF202 |
|            |        |            |      | rs597530   | ZNF202 |
|            |        |            |      | rs9326264  | ZNF202 |

**Supplementary Table 5b** List of CNV SNPs with rs numbers included in the 768 Illumina bead Array

| <i>rs</i>  | <i>CNV (Redon et al, 2007)(11)</i> |
|------------|------------------------------------|
| rs10002047 | 4q26                               |
| rs10155079 | 4p15.1                             |
| rs1037388  | 1q31                               |
| rs10405246 | 19q13                              |
| rs1048374  | 11q12.1                            |
| rs10494095 | 1p13                               |
| rs10501812 | 11q21                              |
| rs10503141 | 18q22.1                            |
| rs10958546 | 8q11.23                            |
| rs1118333  | 11q11                              |
| rs11203531 | 8p22                               |
| rs11581756 | 1q21                               |
| rs11697985 | 20p13                              |
| rs11753874 | 6p25                               |
| rs12213776 | 6q14                               |
| rs12455301 | 18q22.1                            |
| rs13220198 | 6q14                               |
| rs1339867  | 1q41                               |
| rs1342114  | 9q31                               |
| rs136989   | 22q13                              |
| rs1424241  | 16q22.3                            |
| rs1553911  | 4p15.1                             |
| rs1559698  | 4q31                               |
| rs1779540  | 14q21                              |

**Supplementary Table 6.** Comparison between statistically significant SNPs and independent genetic loci associated with each of the phenotypes tested. Arrangement into loci using LD clumping in PLINK with an  $R^2$  of 0.01.

| Trait           | Significant SNPs | Independent SNPs or loci | no. genes |
|-----------------|------------------|--------------------------|-----------|
| Triglycerides   | 37               | 20                       | 16        |
| Cholesterol     | 16               | 7                        | 5         |
| LDL-cholesterol | 23               | 8                        | 10        |
| HDL-cholesterol | 6                | 6                        | 5         |
| ApoA1           | 9                | 7                        | 7         |
| APOB            | 12               | 7                        | 8         |
| Lp-PLA2         | 3                | 2                        | 2         |
| BMI             | 2                | 1                        | 1         |
| Fibrinogen      | 7                | 3                        | 4         |
| FVII            | 14               | 9                        | 9         |
| CRP             | 5                | 2                        | 2         |
| Total           | 134              | 72                       | 69        |

**Supplementary Table 7.** Additional genes, SNPs and their rs numbers genotyped in NPHSII

| <i>Rs number /SNP</i> | <i>Gene</i> | <i>Rs number /SNP</i>     | <i>Gene</i>   | <i>Rs number /SNP</i> | <i>Gene</i> |
|-----------------------|-------------|---------------------------|---------------|-----------------------|-------------|
| In10 in/del(11)       | ACE         | rs429358                  | APOE          | c2207† (12)           | IGF2        |
| rs698                 | ADH1C       | rs7412                    | APOE          | rs2230949             | IGF2        |
| rs17300539            | ADIPOQ      | rs5186                    | AT1           | c2722† (12)           | IGF2        |
| rs1501299             | ADIPOQ      | rs1675 (13)               | AT2           | c8173† (12)           | IGF2        |
| rs266729              | ADIPOQ      | 3123 (13)                 | AT2           | AluI(12)              | IGF2        |
| rs2241766             | ADIPOQ      | -699G>C(14)               | <i>BDKRB1</i> | rs680                 | IGF2        |
| rs1801253             | ADRB1       | Ex1 del/ins 9bp(14)       | <i>BDKRB2</i> | rs3741211             | IGF2        |
| rs4994                | ADRB3       | Ex8 del/ins 68bp(15)      | CBS           | rs360729              | IL18        |
| rs2067853             | AGT         | rs10757274                | CDKN2A        | rs549908              | IL18        |
| rs11122574            | AGT         | rs2383206                 | CDKN2A        | rs1946519             | IL18        |
| rs11122580            | AGT         | rs708272                  | CETP          | rs2043055             | IL18        |
| rs3789679             | AGT         | rs2229579                 | CNR1          | rs3882891             | IL18        |
| rs11568030            | AGT         | rs1130864                 | CRP           | rs3814721             | IL18        |
| rs6687360             | AGT         | rs1205                    | CRP           | rs2298455             | IL18        |
| rs3789666             | AGT         | rs3093077                 | CRP           | rs1541304             | IL18        |
| rs10864772            | AGT         | rs3091244                 | CRP           | rs1800795             | IL6         |
| rs 2031373            | ANGPTL3     | rs6918698                 | CTGF          | rs1800796             | IL6         |
| rs 12042319           | ANGPTL3     | rs1799998                 | CYP11P2       | rs10499563            | IL6         |
| rs4076317             | ANGPTL4     | rs4314418                 | F12           | rs689                 | INS         |
| rs7255436             | ANGPTL4     | 20210G-A(16)              | F2            | rs7566605             | INSIG1      |
| rs1044250             | ANGPTL4     | rs6025                    | F5            | rs4986970             | LCAT        |
| rs11672433            | ANGPTL4     | -670A>C (17)              | F7            | rs11669576            | LDLR        |
| rs7252574             | ANGPTL4     | rs6046                    | F7            | rs45508991            | LDLR        |
| rs1808536             | ANGPTL4     | -402G>A (17)              | F7            | -514C>T(18)           | LIPC        |
| g118α E40K(19)        | ANGTPL4     | In/del(17)                | F7            | -60C>G(20)            | LIPE        |
| rs670                 | APOA1       | rs2070011                 | FGA           | In4T>C(20)            | LIPE        |
| rs675                 | APOA4       | rs1800790                 | FGB           | rs1801177             | LPL         |
| rs5110                | APOA5       | rs1800791                 | FGB/G         | rs1800590             | LPL         |
| rs3135506             | APOA5       | rs1421085                 | FTO           | -95G>T (21)           | LPL         |
| rs662799              | APOA5       | rs2187331                 | GAL           | rs268                 | LPL         |
| rs1729408             | APOA5-A4    | rs780094                  | GCKR          | Rs328                 | LPL         |
| rs693                 | APOB        | mu-1(22)                  | GSTM1         | 256G>C                | LTBP1       |
| rs1801701             | APOB        | theta-1(22)               | GSTT1         | rs947791              | LTBP3       |
| rs1042031             | APOB        | <a href="#">rs7080536</a> | HABP2         | rs4244811             | LTBP3       |
| Ins/del(23)           | APOB        | rs7873                    | IGF12         | rs11601767            | LTBP3       |
| rs4520                | APOC3       | rs1003483                 | IGF2          | rs2369006             | LTBP4       |
| 3'utr g>(24)          | APOC3       | a6815†(12)                | IGF2          | rs393569              | LTBP4       |
| rs2854117             | APOC3       | rs3168310                 | IGF2          | rs11083560            | LTBP4       |





**Supplementary Table 8.** Power calculation showing the effect sizes that could be detected at 80% power for an  $\alpha$  value of 0.05, for a range of minor allele frequencies.

| MAF  | Rare Hz | St Effect size |
|------|---------|----------------|
| 0.05 | 0.0025  | 1.702          |
| 0.1  | 0.01    | 0.8463         |
| 0.2  | 0.04    | 0.4467         |
| 0.3  | 0.09    | 0.3223         |
| 0.4  | 0.16    | 0.2653         |
| 0.5  | 0.25    | 0.2343         |

## References

1. Wallace, C., Newhouse, S.J., Braund, P., Zhang, F., Tobin, M., Falchi, M., Ahmadi, K., Dobson, R.J., Marcano, A.C., Hajat, C. et al. (2008) Genome-wide association study identifies genes for biomarkers of cardiovascular disease: serum urate and dyslipidemia. *Am. J. Hum. Genet.*, **82**, 139-149.
2. Talmud, P.J., Presswood, E., Smart, M., Cooper, J.A., Drenos, F., Palmen, J., and Humphries, S.E. (2008) A tagging SNP approach to analyse the relationship between variation in *ANGPTL4* and plasma triglyceride levels. *Arterioscler Thromb Vasc Biol.*, **28**, 2319-2325.
3. Kathiresan, S., Melander, O., Guiducci, C., Surti, A., Burt, N.P., Rieder, M.J., Cooper, G.M., Roos, C., Voight, B.F., Havulinna, A.S. et al. (2008) Six new loci associated with blood low-density lipoprotein cholesterol, high-density lipoprotein cholesterol or triglycerides in humans. *Nat. Genet.*, **40**, 189-197.
4. Sandhu, M.S., Waterworth, D.M., Debenham, S.L., Wheeler, E., Papadakis, K., Zhao, J.H., Song, K., Yuan, X., Johnson, T., Ashford, A. et al. (2008) LDL-cholesterol concentrations: a genome-wide association study. *Lancet*, **371**, 483-491.
5. Willer, C.J., Sanna, S., Jackson, A.U., Scuteri, A., Bonnycastle, L.L., Clarke, R., Heath, S.C., Timpson, N.J., Najjar, S.S., Stringham, H.M. et al. (2008) Newly identified loci that influence lipid concentrations and risk of coronary artery disease. *Nat. Genet.*, **40**, 161-169.
6. Li, H., Wetten, S., Li, L., St Jean, P.L., Upmanyu, R., Surh, L., Hosford, D., Barnes, M.R., Briley, J.D., Borrie, M. et al. (2008) Candidate single-nucleotide polymorphisms from a genomewide association study of Alzheimer disease. *Arch. Neurol.*, **65**, 45-53.
7. Webster, J.A., Myers, A.J., Pearson, J.V., Craig, D.W., Hu-Lince, D., Coon, K.D., Zismann, V.L., Beach, T., Leung, D., Bryden, L. et al. (2008) Sor11 as an Alzheimer's disease predisposition gene? *Neurodegener. Dis.*, **5**, 60-64.

8. Gaunt, T.R., Cooper, J.A., Miller, G.J., Day, I.N., and O'Dell, S.D. (2001) Positive associations between single nucleotide polymorphisms in the IGF2 gene region and body mass index in adult males. *Hum. Mol. Genet.*, **10**, 1491-1501.
9. Kathiresan, S., Melander, O., Anevski, D., Guiducci, C., Burt, N.P., Roos, C., Hirschhorn, J.N., Berglund, G., Hedblad, B., Groop, L. et al. (2008) Polymorphisms associated with cholesterol and risk of cardiovascular events. *N. Engl. J. Med.*, **358**, 1240-1249.
10. Humphries, S.E., Lane, A., Green, F.R., Copper, J., and Miller, G.J. (1994) Factor VII coagulant activity and antigen levels in healthy men are determined by interaction between factor VII genotype and plasma triglyceride concentration. *Arterioscler. Thromb.*, **14**, 193-198.
11. Redon, R., Ishikawa, S., Fitch, K.R., Feuk, L., Perry, G.H., Andrews, T.D., Fiegler, H., Shapero, M.H., Carson, A.R., Chen, W. et al. (2006) Global variation in copy number in the human genome. *Nature*, **444**, 444-454.
12. Cambien, F., Poirier, O., Lecerf, L., Evans, A., Cambou, J.P., Arveiler, D., Luc, G., Bard, J.M., Bara, L., Ricard, S. et al. (1992) Deletion polymorphism in the gene for angiotensin-converting enzyme is a potent risk factor for myocardial infarction. *Nature*, **359**, 641-644.
13. Jones, A., Dhamrait, S.S., Payne, J.R., Hawe, E., Li, P., Toor, I.S., Luong, L.-A., Wootton, P., Miller, G.J., Humphries, S.E. et al. (2003) Genetic variants of angiotensin II receptor in cardiovascular risk in hypertension. *Hypertension*, **42**, 500-506.
14. Dhamrait, S.S., Payne, J.R., Li, P., Jones, A., Toor, I.S., Copper, J.A., Hawe, E., Palmén, J., Wootton, P., Miller, G.J. et al. (2003) Variation in bradykinin receptor genes increase the cardiovascular risk associated with hypertension. *Eur. Heart J.*, **24**, 1672-1680.
15. Dekou, V., Gudnason, V., Hawe, E., Miller, G.J., Stansbie, D., and Humphries, S.E. (2001) Gene-environment and gene-gene interaction in the determination of plasma homocysteine levels in healthy middle-aged men. *Thromb. Haemost.*, **85**, 67-74.

16. Bauer, K.A., Humphries, S., Smillie, B., Li, L., Cooper, J.A., Barzegar, S., Rosenberg, R.D., and Miller, G.J. (2000) Prothrombin activation is increased among asymptomatic carriers of the prothrombin G20210A and factor V Arg506Gln mutations. *Thromb. Haemost.*, **84**, 396-400.
17. Carew, J.A., Basso, F., Miller, G.J., Hawe, E., Jackson, A.A., Humphries, S.E., and Bauer, K.A. (2003) A functional haplotype in the 5' flanking region of the factor VII gene is associated with an increased risk of coronary heart disease. *J. Thromb. Haemost.*, **1**, 2179-2185.
18. Talmud, P.J., .Hawe, E., Robertson, K., Miller, G.J., .Miller, N.E., and Humphries, S.E. (2002) Genetic and environmental determinants of plasma high density lipoprotein cholesterol and apolipoprotein AI concentrations in healthy middle-aged men. *Ann Hum Genet*, **66**, 111-124.
19. Romeo, S., Pennacchio, L.A., Fu, Y., Boerwinkle, E., Tybjaerg-Hansen, A., Hobbs, H.H., and Cohen, J.C. (2007) Population-based resequencing of ANGPTL4 uncovers variations that reduce triglycerides and increase HDL. *Nat. Genet.*, **39**, 513-516.
20. Talmud, P.J., Palmen, J., and Walker, M. (1998) Identification of genetic variation in the human hormone-sensitive lipase gene and 5' sequences: homology of 5' sequences with mouse promoter and identification of potential regulatory elements. . *Biochem Biophys. Res Commun.*, **252**, 661-668.
21. Hall, S., Chu, G., Miller, G., Cruickshank, K., Cooper, J.A., Humphries, S.E., and Talmud, P.J. (1997) A common mutation in the lipoprotein lipase gene promoter, - 93T/G, is associated with lower plasma triglyceride levels and increased promoter activity in vitro. *Arterioscler. Thromb. Vasc. Biol.*, **17**, 1969-1976.
22. Hayek, T., Stephens, J.W., Hubbart, C.S., Acharya, J., Caslake, M.J., Hawe, E., Miller, G.J., Hurel, S.J., and Humphries, S.E. (2006) A common variant in the glutathione S transferase gene is associated with elevated markers of inflammation and lipid peroxidation in subjects with diabetes mellitus. *Atherosclerosis*, **184**, 404-412.
23. Boerwinkle, E. and Chan, L. (1989) A three codon insertion/deletion polymorphism in the signal peptide region of the human apolipoprotein B (APOB) gene directly typed by the polymerase chain reaction. *Nucleic Acids Res.*, **17**, 4003-4003.

24. Waterworth, D.M., Talmud, P.J., Bujac, S.R., Fisher, R.M., Miller, G.J., and Humphries, S.E. (2000) Contribution of apolipoprotein C-III gene variants to determination of triglyceride levels and interaction with smoking in middle-aged men. *Arterioscler. Thromb. Vasc. Biol.*, **20**, 2663-2669.
25. Webb, K.E., Martin, J.F., Hamsten, A., Eriksson, P., Iacoviello, L., Gattone, M., Donati, M.B., Di Castelnuovo, A., Erusalimsky, J., and Humphries, S.E. (2001) Polymorphisms in the thrombopoietin gene are associated with risk of myocardial infarction at a young age. *Atherosclerosis*, **154**, 703-711.
26. Talmud, P.J., Palmen, J., Miller, G., and Humphries, S.E. (2000) Effect of microsomal triglyceride transfer protein gene variants (-493G > T, Q95H and H297Q) on plasma lipid levels in healthy middle-aged UK men. *Ann. Hum. Genet.*, **64**, 269-276.
27. Jeerooburkhan, N., Jones, L.C., Bujac, S., Cooper, J.A., Miller, G.J., Vallance, P., Humphries, S.E., and Hingorani, A.D. (2001) Genetic and environmental determinants of plasma nitrogen oxides and risk of ischemic heart disease. *Hypertension*, **38**, 1054-1061.
28. Flavell, D.M., Pineda Torra, I., Jamchidi, Y., Evans, D., Diamond, J.R., Elkeles, R.S., Bujac, S.R., Miller, G., Talmud, P.J., Staels, B. et al. (2000) Variation in the PPAR-alpha gene is associated with altered function in vitro and plasma lipid concentrations in Type II diabetic subjects. *Diabetologia*, **43**, 673-680.
29. Robertson, K.S., Hawe, E., Miller, G.J., Humphries, S.E., and Talmud, P.J. (2003) Human paraoxonase gene cluster polymorphisms as predictors of coronary heart disease risk on a prospective study. Northwick Park Heart Study II. *Biochim Biophys Acta*, **1639**, 203-212.

**Supplementary Figure 1** Correlation between continuous phenotypes in men from the Northwick Park Heart Study  
 Values in the cells are absolute p-values for the between-phenotype associations

|               | BMI      | Systolic  | Diastolic | Cholesterol | HDL       | LDL       | Triglycerides | APOB     | APOA     | Homocyst | Folate   | LpPLA2   | CRP       | F7       |
|---------------|----------|-----------|-----------|-------------|-----------|-----------|---------------|----------|----------|----------|----------|----------|-----------|----------|
| Systolic      | 1.85E-21 |           |           |             |           |           |               |          |          |          |          |          |           |          |
| Diastolic     | 6.57E-33 | 6.39E-315 |           |             |           |           |               |          |          |          |          |          |           |          |
| Cholesterol   | 2.76E-06 | 4.58E-06  | 9.45E-05  |             |           |           |               |          |          |          |          |          |           |          |
| HDL           | 7.27E-17 | 8.50E-05  | 1.87E-12  | 5.23E-01    |           |           |               |          |          |          |          |          |           |          |
| LDL           | 3.97E-03 | 1.99E-01  | 5.03E-01  | 1.00E-250   | 6.15E-10  |           |               |          |          |          |          |          |           |          |
| Triglycerides | 1.64E-75 | 2.75E-25  | 3.57E-29  | 2.85E-75    | 1.58E-123 | 3.94E-04  |               |          |          |          |          |          |           |          |
| APOB          | 8.69E-14 | 9.17E-04  | 1.94E-01  | 2.06E-245   | 7.28E-10  | 4.21E-166 | 5.26E-41      |          |          |          |          |          |           |          |
| APOA          | 1.68E-12 | 9.13E-01  | 8.05E-02  | 3.74E-07    | 1.27E-123 | 1.18E-01  | 2.67E-27      | 2.72E-37 |          |          |          |          |           |          |
| Homocyst      | 7.11E-02 | 6.34E-04  | 8.07E-02  | 4.75E-01    | 7.05E-01  | 5.98E-01  | 6.27E-01      | 2.49E-01 | 1.66E-01 |          |          |          |           |          |
| Folate        | 2.39E-05 | 2.99E-01  | 6.57E-01  | 1.63E-01    | 8.09E-01  | 8.84E-01  | 3.35E-05      | 7.24E-01 | 3.20E-01 | 1.12E-78 |          |          |           |          |
| LpPLA2        | 1.30E-04 | 3.61E-05  | 4.39E-05  | 6.29E-53    | 5.61E-24  | 1.71E-29  | 1.80E-29      | 2.34E-17 | 4.75E-04 | 1.15E-01 | 6.03E-01 |          |           |          |
| CRP           | 1.79E-40 | 1.08E-14  | 2.96E-08  | 1.30E-07    | 1.09E-20  | 7.68E-04  | 4.51E-34      | 8.93E-11 | 1.52E-16 | 5.54E-02 | 1.14E-01 | 4.30E-02 |           |          |
| F7            | 5.78E-06 | 1.09E-05  | 1.27E-08  | 1.32E-35    | 1.94E-01  | 3.05E-07  | 7.25E-49      | 6.40E-20 | 2.19E-01 | 1.26E-02 | 6.25E-01 | 7.79E-01 | 2.00E-11  |          |
| FIB           | 7.05E-05 | 1.91E-08  | 3.54E-03  | 1.95E-07    | 9.38E-17  | 1.13E-07  | 1.44E-04      | 2.01E-15 | 1.34E-15 | 1.98E-02 | 1.55E-01 | 3.92E-01 | 3.86E-126 | 1.04E-01 |

**Supplementary Figure 2** Correlations between protein phenotypes linked to CHD in 2775 men from the NPHS-II Study. Values in cells indicate Pearson's correlation co-efficient r. \* p<0.01, \*\* p<0.001.

|               | <b>ApoB</b> | <b>ApoAI</b> | <b>LpPLA2</b> | <b>CRP</b> | <b>F7</b> |
|---------------|-------------|--------------|---------------|------------|-----------|
| <b>ApoAI</b>  | -0.2433**   |              |               |            |           |
| <b>LpPLA2</b> | 0.193**     | -0.0802**    |               |            |           |
| <b>CRP</b>    | 0.1344**    | -0.1707**    | 0.0433*       |            |           |
| <b>F7</b>     | 0.1755**    | 0.0238       | 0.0058        | 0.1277**   |           |
| <b>FIB</b>    | 0.1528**    | -0.1538**    | 0.0178        | 0.434**    | 0.0942    |

**Supplementary Figure 3:** Power calculation plot showing the relationship between MAF and effect size

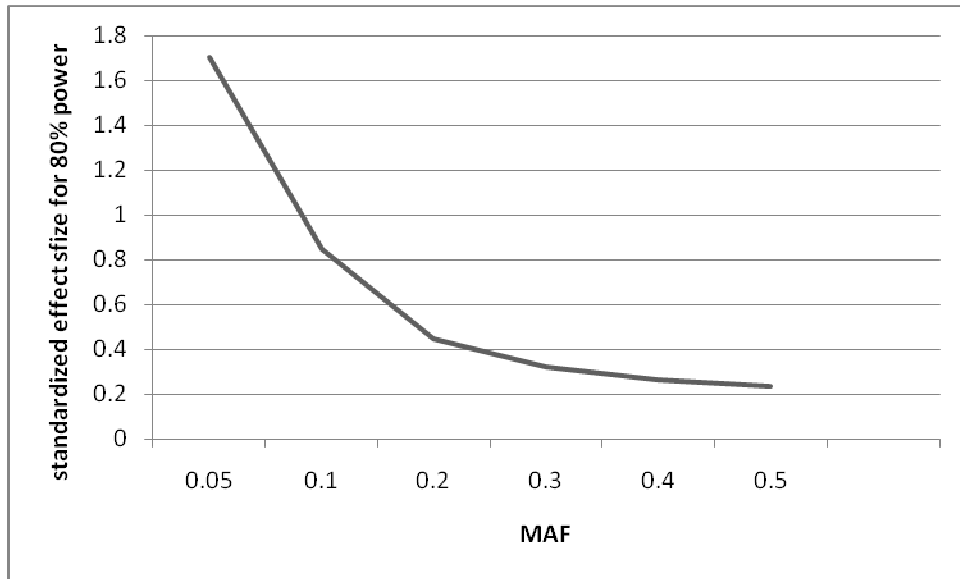

Supplement: ddp159_1.pdf [file ddp159_1.pdf]
